# Supplementary material for: Elucidation of the Correlation between Heme Distortion and Tertiary Structure of the Heme-Binding Pocket Using a Convolutional Neural Network
Source: Biomolecules. 2022 Aug 24;12(9):1172. doi: 10.3390/biom12091172 (PMC9496533; doi:10.3390/biom12091172)
Supplement: Supplementary file 1 [file biomolecules-12-01172-s001.zip › chain_ids.csv]

pdbid	heme_asym_id	heme_chain_id
1ccr	1	A
3c2c	1	A
2cdv	1	A
2cdv	2	A
2cdv	3	A
2cdv	4	A
5cyt	1	R
1mba	1	A
256b	4	A
1ycc	2	A
2hbg	1	A
1yea	2	A
1yeb	2	A
1bab	4	A
1dxv	6	B
1raq	2	A
1ctz	2	A
1fcs	3	A
2mge	2	A
2mgg	2	A
2mgj	2	A
4sdh	2	A
1crg	2	A
1crh	2	A
1cri	2	A
1yma	2	A
1mgn	2	A
1cxc	1	A
1chh	2	A
1chi	2	A
1chj	2	A
1mlg	2	A
1mlk	2	A
1mln	2	A
1mlr	2	A
2cy3	1	A
2cy3	2	A
2cy3	3	A
2cy3	4	A
1cot	1	A
1cyo	1	A
1gdj	1	A
1hrm	2	A
1cie	2	A
1cif	2	A
1cig	2	A
1cih	2	A
1csu	2	A
1csv	2	A
1csw	2	A
1csx	2	A
1moa	2	A
1mod	2	A
1hsy	2	A
1mtj	2	A
1cgo	1	A
1cyj	5	A
1ytc	2	A
1ctj	1	A
1cpq	1	A
1gbv	6	B
1gbu	6	B
1wad	2	A
1wad	3	A
1wad	4	A
1wad	5	A
1irv	2	A
1irw	2	A
1hcz	1	A
1ibe	2	A
1ibe	3	B
1gzb	4	A
1abs	2	A
2cth	2	A
2cth	3	A
2cth	4	A
2cth	5	A
1c52	1	A
1bgp	3	A
3cyr	1	A
3cyr	2	A
3cyr	3	A
3cyr	4	A
1awp	2	A
1a00	5	B
1a01	5	B
1sox	6	A
1a3o	4	A
4hbi	2	A
6hbi	2	A
1mwd	2	A
1mdn	2	A
6hbw	5	B
1bzp	4	A
1bzz	4	A
3cao	5	A
3cao	6	A
3cao	7	A
3cao	8	A
19hc	5	A
19hc	6	A
19hc	7	A
19hc	8	A
19hc	9	A
19hc	10	A
19hc	11	A
19hc	12	A
19hc	13	A
1cg5	2	A
1cg5	3	B
1c6r	5	A
1ci3	3	M
1qdb	8	A
1qdb	9	A
1qdb	10	A
1qdb	11	A
1co6	1	A
1qks	2	A
1cqx	3	A
1cxy	1	A
1d0c	5	A
1d7c	8	A
1dgf	5	A
1dk0	2	A
1do3	4	A
1dxd	1	A
1duw	1	A
1duw	2	A
1duw	3	A
1duw	4	A
1duw	5	A
1duw	6	A
1duw	7	A
1duw	8	A
1duw	9	A
1dw0	4	A
1c75	1	A
1c7c	5	B
1ehg	1	A
1eue	2	A
1ew0	1	A
1e29	1	A
1e2v	3	A
1e2w	2	A
1fhj	5	B
1fj0	5	A
1gcv	4	A
1gcv	5	B
1ft5	4	A
1ft5	5	A
1ft5	6	A
1ft5	7	A
1gdv	1	A
1hh5	1	A
1hh5	2	A
1hh5	3	A
1i77	1	A
1i77	2	A
1i77	3	A
1i77	4	A
1icc	6	A
1jdl	1	A
1jf3	1	A
1jf4	1	A
1iqc	8	A
1jmx	4	A
1jmx	5	A
1jni	1	A
1jni	2	A
1jzm	2	A
1kb0	2	A
1gq1	2	A
1gqa	2	A
1kfr	4	A
1it2	2	A
1kqf	11	C
1kqf	12	C
1gu2	2	A
1kv9	3	A
1kzm	4	A
1gwu	2	A
1la6	4	B
1iw1	4	A
1lj0	6	A
1gyo	2	A
1gyo	3	A
1gyo	4	A
1gyo	5	A
1lqx	1	A
1lr6	1	A
1ls9	1	A
1lyc	4	A
1m1q	3	A
1m1q	4	A
1m1q	5	A
1m1q	6	A
1m20	1	A
1m2i	1	A
1m2m	1	A
1m59	1	A
1m70	4	A
1m70	5	A
1m7v	2	A
1m85	9	A
1h32	3	A
1h32	6	B
1mj4	2	A
1mkr	1	A
1mqv	2	A
1mz4	7	A
1n5u	6	A
1o1j	5	B
1o1l	3	A
1o1m	3	A
1o1m	5	B
1o1n	3	A
1o1o	5	B
1o1o	6	C
1o1p	5	B
1j0o	1	A
1j0o	2	A
1j0o	3	A
1j0o	4	A
1j0p	3	A
1j0p	4	A
1j0p	5	A
1j0p	6	A
1n97	3	A
1os6	4	A
1os6	5	A
1os6	6	A
1ozw	4	B
1ofw	2	A
1ofw	3	A
1ofw	4	A
1ofw	5	A
1ofw	6	A
1ofw	7	A
1ofw	8	A
1ofw	9	A
1ofw	10	A
1pby	3	A
1pby	4	A
1pl3	8	A
1po5	1	A
1oj6	4	A
1q1f	1	A
1q4g	21	B
1qwl	5	B
1r1y	4	A
1up9	1	A
1up9	2	A
1up9	3	A
1up9	4	A
1urv	2	A
1v4x	4	A
1v4x	5	B
1rwj	1	A
1rwj	2	A
1rwj	3	A
1s67	4	U
1s6v	5	A
1s6v	6	B
1sog	2	A
1sy7	2	A
1t93	1	A
1wiy	2	A
1w2l	1	A
1u9m	6	A
1u9u	1	A
1x8v	1	A
1w7o	1	A
1w7o	2	A
1w7o	3	A
1w7o	4	A
1xq5	7	D
1wr5	1	A
1wr5	2	A
1wr5	3	A
1wr5	4	A
1xqd	1	A
1xy0	4	A
1xz4	4	A
1xz7	4	A
1y0p	2	A
1y0p	3	A
1y0p	4	A
1y0p	5	A
1y45	5	B
1y4g	5	B
1y4p	5	B
1y4v	5	B
1y5i	12	C
1y5i	13	C
1y7d	5	B
1y7z	5	B
1y83	5	B
1wve	11	C
2bgv	1	X
2bh4	1	X
2bk9	1	A
1z10	6	B
2blf	4	B
1z9n	6	A
2bq4	2	A
2bq4	3	A
2bq4	4	A
2bq4	5	A
1x3x	2	A
2bs2	12	C
2bs2	13	C
2cvc	1	A
2cvc	2	A
2cvc	3	A
2cvc	4	A
2cvc	5	A
2cvc	6	A
2cvc	7	A
2cvc	8	A
2cvc	9	A
2cvc	10	A
2cvc	11	A
2cvc	12	A
2cvc	13	A
2cvc	14	A
2cvc	15	A
2cvc	16	A
2a3m	1	A
2a3m	2	A
2a3m	3	A
2a3m	4	A
2aa1	4	A
2aa1	5	B
2czs	5	A
2czs	6	A
2aiu	3	A
2d0w	7	A
2aup	2	A
2av3	2	A
2c1d	8	A
2c1d	14	B
2c1v	3	A
2b4z	1	A
2bcn	4	B
2eut	1	A
2ewi	1	A
2ewi	2	A
2ewi	3	A
2ewi	4	A
2ewk	1	A
2ewk	2	A
2ewk	3	A
2ewk	4	A
2ewu	1	A
2ewu	2	A
2ewu	3	A
2ewu	4	A
2exv	2	A
2c8s	1	A
2dc3	2	A
2fkz	16	B
2cd8	2	A
2ce0	1	A
2fwt	1	A
2fwt	2	A
2g5g	1	X
2dge	5	A
2gc7	17	D
2ggn	4	X
2ciw	4	A
2dn2	4	A
2dn2	5	B
2gsm	11	A
2h88	28	C
2h8f	4	A
2h8f	5	B
2ivf	23	C
2hi4	1	A
2j0p	1	A
2hz1	4	A
2hz3	5	A
2ia8	1	A
2ibj	3	A
2imq	1	X
2isa	8	A
2itf	4	A
2j8w	2	A
2nw8	4	A
2o6p	5	A
2p0b	1	A
2p0b	2	A
2p0b	3	A
2p0b	4	A
2p0b	5	A
2yxc	1	A
2yxc	2	A
2yxc	3	A
2yxc	4	A
2yyw	1	A
2yyw	2	A
2yyw	3	A
2yyw	4	A
2yyx	1	A
2yyx	2	A
2yyx	3	A
2yyx	4	A
2v07	1	A
2v08	2	A
2v1k	1	A
2z47	2	A
2z47	3	A
2z47	4	A
2z47	5	A
2v7j	2	A
2z6f	1	A
2r1h	11	D
2r4y	3	B
2z85	2	A
2rdz	7	A
2rdz	8	A
2rdz	9	A
2rdz	10	A
3b42	2	A
2zbo	6	A
2zby	1	A
2zdo	4	A
3bnj	11	A
3bnj	12	A
3bnj	13	A
3bnj	14	A
2zfo	6	B
2zfo	8	C
2zfo	10	D
3bxu	3	A
3bxu	4	A
3bxu	5	A
3c62	6	A
3c63	6	A
3cp5	2	A
3cqv	1	A
3cu4	1	A
3cx5	26	C
3cx5	27	C
3cx5	32	D
2zon	10	G
2zoo	4	A
3dan	1	A
2vv6	4	A
3de8	9	A
3dmi	2	A
3dp5	2	A
3dsk	2	A
3dut	6	B
3e2c	5	A
3e4w	2	A
3e7m	3	A
3egw	12	C
3egw	13	C
3ejb	11	B
3ell	2	A
2w31	2	A
2w3f	2	A
2zwu	1	A
2w72	4	A
2w72	15	B
2w72	21	C
3fm1	1	A
3fo3	3	A
3fo3	4	A
3fo3	5	A
3fo3	6	A
3fo3	7	A
3fo3	8	A
3fo3	9	A
2zxy	1	A
3fwg	2	A
3g1q	7	D
2zzs	62	1
3gqp	7	D
3h34	1	A
3h34	2	A
3h34	3	A
3h4n	2	A
3h4n	3	A
3h4n	4	A
3h57	1	A
3h8t	2	A
3hc9	1	A
3hen	1	A
2wiv	2	A
2wjn	4	C
2wjn	5	C
2wjn	6	C
2wjn	7	C
3hnj	4	A
3hq9	3	A
3hx9	2	A
3ia8	2	A
3k3u	2	A
3a9f	2	A
3aba	1	A
3lb2	6	B
3lf5	2	A
3lgm	2	A
2x5w	4	A
3m3a	1	A
3m4c	5	A
3m97	1	X
2xbk	1	A
3mkb	4	A
3ml1	6	B
3ml1	7	B
3mol	2	A
3mvc	2	A
3ner	2	A
3nmm	4	A
3nwv	4	A
2xl8	1	A
2xld	1	A
2xlh	1	A
2xm0	1	A
2xm4	1	A
3o5c	5	A
3oa8	7	B
3ogb	1	A
3oj1	2	A
3orv	7	A
3orv	8	A
3ozz	1	B
2xts	10	B
3pc3	1	A
2xvy	1	A
2y3q	12	A
2y3q	15	B
2y6b	1	A
3qjd	4	A
3qje	6	B
3qm6	1	A
3qqq	2	A
3qw0	4	A
3qzl	1	A
3qzm	2	A
3qzn	6	B
3qzx	1	A
3r9b	3	A
3rmz	10	A
3rtl	4	A
2yk3	3	A
3s8g	3	A
2ykz	1	A
3sj0	1	X
3sj0	2	X
3sj0	3	X
3sj1	1	X
3sj1	2	X
3sj1	3	X
3sj4	1	X
3sj4	2	X
3sj4	3	X
3sjl	9	A
3sjl	10	A
3sxq	3	A
3sxq	4	A
3sxq	5	A
3sxq	6	A
3sxq	7	A
3sxq	8	A
3sxq	9	A
3t6d	4	C
3t6d	5	C
3t6d	6	C
3t6d	7	C
3tfd	2	A
3tff	2	A
3tfg	2	A
3tga	1	A
3tld	2	A
3tm3	1	A
3tm9	1	A
3tol	4	A
3ttv	4	A
3u99	1	A
3u99	2	A
3ucp	1	A
3ucp	2	A
3ucp	3	A
3ucp	4	A
3ucp	5	A
3ucp	6	A
3ucp	7	A
3ucp	8	A
3ucp	9	A
3ucp	10	A
3ucp	11	A
3uhk	4	A
3uhn	2	A
3uhq	2	A
3uhr	2	A
3uht	2	A
3uhv	2	A
3uhx	2	A
3uhz	2	A
3ui0	2	A
3uoi	48	B
3vlh	2	A
4aan	2	A
4dnj	1	A
4aj9	24	C
3vp5	1	A
4am5	2	A
4eic	1	A
4eid	1	A
4eie	1	A
4eif	1	A
4ek1	2	A
3vrc	2	A
3vrd	2	A
3vrd	3	A
4aul	4	A
4ave	1	A
4fnh	2	A
4fvc	6	A
4b2n	3	A
4ged	5	B
4b8n	4	A
4gyd	6	A
4h0j	6	A
4h0k	2	A
4h8q	1	A
4haj	1	A
4haj	2	A
4haj	3	A
4hb6	1	A
4hb6	2	A
4hb6	3	A
4hb8	1	A
4hb8	2	A
4hb8	3	A
4hbf	1	A
4hbf	2	A
4hbf	3	A
4hc3	1	A
4hc3	2	A
4hc3	3	A
4hdl	1	A
4hdl	2	A
4hdl	3	A
4hil	2	A
4hpc	1	A
3w08	2	A
2yoo	4	A
4hrt	8	A
4hrt	9	B
3zcf	4	A
4iam	2	A
3ziy	3	A
4j20	8	A
4j6c	3	A
4jcg	1	A
3zoo	4	A
4jea	4	A
4jj0	2	A
4jj0	3	A
4bja	1	A
4kf0	2	A
4bly	3	A
4bm1	4	A
4kky	1	X
4kmg	1	A
4kmw	2	A
4kn3	2	A
4kvk	1	A
4l0f	1	A
4l3h	7	A
4l3h	8	A
4l6g	2	A
4lji	2	A
4lm8	1	A
4lm8	2	A
4lm8	3	A
4lm8	4	A
4lm8	5	A
4lm8	6	A
4lm8	7	A
4lm8	8	A
4lm8	9	A
4lm8	10	A
3wfw	1	A
4max	3	A
4mpm	2	A
4mqi	3	B
4mu5	1	A
4myp	2	A
4c9p	2	A
4n0k	2	A
4n4j	9	A
4n4j	10	A
4n4j	11	A
4n4j	13	A
4n4j	14	A
4n4j	15	A
4n4j	16	A
4nk2	2	A
4o1t	1	A
4o1w	6	A
4o6u	3	A
4o6y	2	A
4o6y	3	A
4coo	2	A
4oqr	1	A
4pqb	1	A
4q5p	3	A
4czq	3	A
4d1p	2	A
4ulv	2	A
4qi3	2	A
4toa	39	B
4tob	25	B
3wvs	1	A
4qo5	1	A
4qo5	2	A
4qo5	3	A
4qo5	5	A
4qo5	6	A
4qo5	7	A
4qo5	8	A
4qol	4	A
4u99	2	A
4w7o	1	A
3wyo	5	B
4wgz	1	A
4v2k	1	A
4rlr	1	A
4wqd	1	A
4wqd	2	A
4d7j	1	A
4x8y	2	A
4xdi	2	A
3x34	1	A
4xmh	2	A
3x39	2	A
4xxl	1	A
4y4s	1	A
4y7s	3	A
4ye1	2	A
4yzr	2	A
4uiq	2	A
4uiq	3	A
4zva	2	A
5aur	4	A
5aur	12	C
5c0z	4	A
5c9m	4	A
5awi	2	A
5cx7	16	A
5d3u	2	A
5d8x	24	A
5df5	4	A
5dfs	2	A
5aog	3	A
5dyz	2	A
5fnb	4	A
5ev5	1	A
5fuk	4	A
5b3i	4	A
5ikg	1	A
5iqx	1	A
5b51	1	A
5jhy	2	A
5jp7	1	A
5jsl	1	A
5jve	1	A
5jxu	2	A
5b66	160	E
5b82	1	A
5gj3	1	A
5gj3	2	A
5li6	2	A
5lk9	2	A
5kyo	7	B
5syh	2	A
5gyr	8	A
5mfa	6	A
5ty3	2	A
5ucw	2	A
5uda	2	A
5mxz	1	A
5mxy	1	A
5ut8	1	A
5utc	1	A
5ncb	1	A
5xec	2	C
5xec	3	C
5xed	2	C
5via	1	A
5vj0	4	A
5vjt	3	A
5vlx	2	A
5vnu	1	A
5xjn	2	A
5o10	2	A
5o18	1	A
5oc0	1	A
5oc0	2	A
5xzj	4	A
5y5s	36	C
5y5s	37	C
5y5s	38	C
5y5s	39	C
6amg	2	A
5y8a	2	A
6b11	2	A
6bdd	1	A
6bde	1	A
5yqa	1	A
6bld	1	A
6bme	2	A
6f8a	2	A
5z25	1	A
6fks	2	A
5z9j	7	C
6cid	2	A
6fu3	4	A
5ze8	1	A
5ze8	2	A
5ze8	3	A
5ze8	4	A
5ze8	5	A
5zeo	1	A
5ziq	4	A
6d45	1	A
6gd6	1	A
5zur	3	A
5zzg	1	A
6a15	1	A
6ds7	2	A
6a3k	1	A
6duj	2	A
6dy6	4	A
6dy8	4	A
6dyc	3	A
6dyf	2	A
6dyi	2	B
6e0x	4	A
6e44	4	A
6h5z	1	A
6h6i	1	A
6ai5	4	A
6hih	4	A
6hr0	1	A
6hr0	2	A
6hr0	3	A
6hr0	4	A
6myu	57	C
6i43	3	B
6n1o	4	A
6ngm	2	A
6nlg	5	A
6nln	15	A
6j95	1	A
6nx0	2	A
6nzx	1	A
6o0a	2	A
6r6m	2	A
6r6m	3	B
6r6n	2	A
6r6n	3	B
6js9	2	A
6jsa	1	A
6jsb	2	A
6jsc	2	A
6jt6	2	A
6rjr	4	A
6ot4	4	A
6ot7	12	A
6ot8	1	A
6rte	2	A
6p43	4	B
6p43	5	C
6p73	3	A
6p73	4	A
6p73	5	A
6p73	6	A
6k7c	2	A
6k7c	4	C
6k9j	1	A
6po0	4	A
6kfw	1	A
6q2u	1	A
6q2u	2	A
6kq1	4	A
6u97	2	A
6uez	2	A
6t0h	1	A
6upg	1	A
6ldl	1	A
6lde	2	A
6ldg	2	A
6tpo	3	A
6tr1	3	A
6tr1	5	C
6tr1	10	E
6vdq	1	A
6m0q	12	A
6m0q	13	A
6m0q	14	A
6m0q	15	A
6m0q	16	A
6m0q	17	A
6m0q	18	A
6yrj	6	A
6wz0	3	A
6wz3	3	A
6xak	2	A
7coh	26	A
7aba	3	B
7abb	1	A
7acp	2	A
7ah0	1	A
7ah0	2	A
7d8m	1	A
7ant	9	B
7d9f	3	A
7kqs	2	A
7dvr	1	A
7ljx	2	A
7o7g	1	A
7o7g	2	A
7o7g	3	A
7o7g	4	A
7o7g	5	A
7o7g	6	A
7o7g	7	A
7o7g	8	A
7o7g	9	A
7o7g	10	A
7oo5	1	A
7n8o	127	E
7red	1	A
